# Supplementary material for: High-Throughput Chemical Screens Identify Disulfiram as an Inhibitor of Human Glioblastoma Stem Cells
Source: PubMed Central journal article supplement (PMC3717950; doi:10.18632/oncotarget.707), 2012-10-23
Supplement: oncotarget-03-1124-s001.pdf [file oncotarget-03-1124-s001.pdf]

## High-Throughput Chemical Screens Identify Disulfiram as an Inhibitor of Human Glioblastoma Stem

Cells – Hothi et al

**Table S1: Patient samples used in this study.**

|    | <b>Patient</b> | <b>Gender</b> | <b>Age</b> | <b>Diagnosis</b> | <b>Resection location</b> |
|----|----------------|---------------|------------|------------------|---------------------------|
| 1  | SN143          | Male          | 74         | Glioblastoma     | Left Temporal             |
| 2  | SN175          | Female        | 49         | Glioblastoma     | Left Parietal             |
| 3  | SN179          | Male          | 50         | Glioblastoma     | Right Frontal             |
| 4  | SN186          | Male          | 75         | Glioblastoma     | Right Temporal            |
| 5  | SN187          | Male          | 57         | Glioblastoma     | Right Parietal            |
| 6  | SN195          | Female        | 59         | Glioblastoma     | Right Parietal            |
| 7  | SN206          | Male          | 76         | Glioblastoma     | Right Frontal             |
| 8  | SN211          | Female        | 36         | Glioblastoma     | Right Parietal            |
| 9  | SN235          | Male          | 73         | Glioblastoma     | Right Parietal            |
| 10 | G144           | Male          | 51         | Glioblastoma     | Unknown                   |

G144 patient information is taken from the corresponding publication [Pollard SM, et al. Cell Stem Cell. 2009; 4(6): 568-580]. The G144 GSC line was obtained from the BioRep Cell Repository (Milan, Italy). All other patients underwent tumor resection at Swedish Medical Center (Seattle, WA).

**Table S2. Common inhibitors of GSC proliferation.**

|    | Compound                                 | Formula                                                         | Mol. weight | Activity                                       | Status              |
|----|------------------------------------------|-----------------------------------------------------------------|-------------|------------------------------------------------|---------------------|
| 1  | 10-Hydroxycamptothecin                   | C <sub>20</sub> H <sub>16</sub> N <sub>2</sub> O <sub>5</sub>   | 364.36      | Antineoplastic                                 | Experimental        |
| 2  | 2,3-Dichloro-5,8-dihydroxynaphthoquinone | C <sub>10</sub> H <sub>4</sub> Cl <sub>2</sub> O <sub>4</sub>   | 259.05      | Apoptosis inducer                              | Experimental        |
| 3  | 3β-Hydroxy-23,24-bisnorchol-5-enic acid  | C <sub>22</sub> H <sub>34</sub> O <sub>3</sub>                  | 346.51      | Undetermined                                   | Experimental        |
| 4  | 4'-Demethylepipodophyllotoxin            | C <sub>21</sub> H <sub>20</sub> O <sub>8</sub>                  | 400.39      | Antineoplastic                                 | Experimental        |
| 5  | Acetyl gambogic acid                     | C <sub>40</sub> H <sub>47</sub> O <sub>9</sub>                  | 671.81      | Derivative of gambogic acid, undetermined      | Experimental        |
| 6  | Albendazole                              | C <sub>12</sub> H <sub>15</sub> N <sub>3</sub> O <sub>2</sub> S | 265.34      | Anthelmintic                                   | USP                 |
| 7  | Amsacrine                                | C <sub>22</sub> H <sub>20</sub> N <sub>2</sub> O <sub>3</sub> S | 392.48      | Antineoplastic, immune suppressive             | USAN, INN, BAN      |
| 8  | Ancitabine hydrochloride                 | C <sub>9</sub> H <sub>12</sub> ClN <sub>3</sub> O <sub>4</sub>  | 261.67      | Antineoplastic                                 | INN, JAN            |
| 9  | Anisomycin                               | C <sub>14</sub> H <sub>19</sub> NO <sub>4</sub>                 | 265.31      | Antibacterial, inhibits protein synthesis      | Experimental        |
| 10 | Anthothecol                              | C <sub>28</sub> H <sub>32</sub> O <sub>7</sub>                  | 480.56      | Undetermined                                   | Experimental        |
| 11 | Antimycin A                              | C <sub>27</sub> H <sub>38</sub> N <sub>2</sub> O <sub>9</sub>   | 534.61      | Antifungal, antiviral                          | Experimental        |
| 12 | Atorvastatin calcium                     | C <sub>33</sub> H <sub>33</sub> CaFNO <sub>5</sub>              | 582.71      | Antihyperlipidemic, HMGCoA reductase inhibitor | USAN, INN, BAN      |
| 13 | Benzalkonium chloride                    | C <sub>22</sub> H <sub>40</sub> ClN                             | 354.02      | Topical anti-infective                         | USAN, INN, BAN, JAN |
| 14 | β-Peltatin                               | C <sub>22</sub> H <sub>22</sub> O <sub>8</sub>                  | 414.41      | Natural product with antitumor activity        | Experimental        |
| 15 | Camptothecin                             | C <sub>20</sub> H <sub>16</sub> N <sub>2</sub> O <sub>4</sub>   | 348.36      | Antineoplastic                                 | Experimental        |
| 16 | Colchicine                               | C <sub>22</sub> H <sub>25</sub> NO <sub>6</sub>                 | 399.45      | Anti-infective, antimetabolic, antigout agent  | USP, JAN            |
| 17 | Convallatoxin                            | C <sub>29</sub> H <sub>42</sub> O <sub>10</sub>                 | 550.65      | Cardiotonic                                    | Experimental        |
| 18 | Cytarabine                               | C <sub>9</sub> H <sub>13</sub> N <sub>3</sub> O <sub>5</sub>    | 243.22      | Antineoplastic, antiviral                      | USP, INN, BAN, JAN  |
| 19 | Dactinomycin                             | C <sub>62</sub> H <sub>86</sub> N <sub>12</sub> O <sub>16</sub> | 1255.45     | Antineoplastic, intercalating agent            | USP, INN, BAN, JAN  |
| 20 | Daunorubicin                             | C <sub>27</sub> H <sub>29</sub> NO <sub>10</sub>                | 527.53      | Antineoplastic                                 | USAN, INN, BAN, JAN |
| 21 | Deguelin                                 | C <sub>23</sub> H <sub>22</sub> O <sub>6</sub>                  | 394.43      | Antineoplastic, antiviral, insecticide         | Experimental        |
| 22 | Deoxysappanone B 7,4-dimethyl ether      | C <sub>18</sub> H <sub>18</sub> O <sub>5</sub>                  | 314.34      | Undetermined                                   | Experimental        |

|    |                                             |                                                                               |         |                                                          |                     |
|----|---------------------------------------------|-------------------------------------------------------------------------------|---------|----------------------------------------------------------|---------------------|
| 23 | Deoxysappanone B 7,3-dimethyl ether acetate | C <sub>20</sub> H <sub>20</sub> O <sub>6</sub>                                | 356.38  | Undetermined                                             | Experimental        |
| 24 | Digitonin                                   | C <sub>56</sub> H <sub>92</sub> O <sub>29</sub>                               | 1229.34 | Cardiotonic                                              | Experimental        |
| 25 | Digitoxin                                   | C <sub>41</sub> H <sub>64</sub> O <sub>13</sub>                               | 764.96  | Cardiotonic, inotropic                                   | USP, INN, BAN, JAN  |
| 26 | Digoxigenin                                 | C <sub>23</sub> H <sub>34</sub> O <sub>5</sub>                                | 390.52  | Aglycon of digitoxin                                     | Experimental        |
| 27 | Digoxin                                     | C <sub>41</sub> H <sub>64</sub> O <sub>14</sub>                               | 780.96  | Cardiac stimulant                                        | USP, INN, BAN, JAN  |
| 28 | Disulfiram                                  | C <sub>10</sub> H <sub>20</sub> N <sub>2</sub> S <sub>4</sub>                 | 296.54  | Alcohol antagonist                                       | USP, INN, BAN, JAN  |
| 29 | Doxorubicin                                 | C <sub>27</sub> H <sub>29</sub> NO <sub>11</sub>                              | 543.53  | Anineoplastic                                            | USAN, INN, BAN      |
| 30 | Emetine                                     | C <sub>29</sub> H <sub>42</sub> Cl <sub>2</sub> N <sub>2</sub> O <sub>4</sub> | 553.58  | Inhibits RNA, DNA and protein synthesis                  | USP, BAN            |
| 31 | Epirubicin hydrochloride                    | C <sub>27</sub> H <sub>30</sub> ClNO <sub>11</sub>                            | 579.99  | Antineoplastic                                           | USAN, INN, BAN, JAN |
| 32 | Etoposide                                   | C <sub>29</sub> H <sub>32</sub> O <sub>13</sub>                               | 588.57  | Antineoplastic                                           | USP, INN, BAN, JAN  |
| 33 | Fenbendazole                                | C <sub>15</sub> H <sub>13</sub> N <sub>3</sub> O <sub>2</sub> S               | 299.35  | Anthelmintic                                             | USAN, INN, BAN      |
| 34 | Fludarabine phosphate                       | C <sub>10</sub> H <sub>13</sub> FN <sub>5</sub> O <sub>7</sub> P              | 365.22  | Antineoplastic                                           | USP, INN, BAN       |
| 35 | Fluvastatin                                 | C <sub>24</sub> H <sub>26</sub> FNO <sub>4</sub>                              | 411.48  | Antihyperlipidemic, HMGCoA reductase inhibitor           | USAN, INN, BAN      |
| 36 | Gambogic acid                               | C <sub>38</sub> H <sub>44</sub> O <sub>8</sub>                                | 628.77  | Antiinflammatory, apoptosis inducer                      | Experimental        |
| 37 | Gitoxigenin diacetate                       | C <sub>27</sub> H <sub>38</sub> O <sub>7</sub>                                | 474.6   | Aglycon of gitoxin                                       | Experimental        |
| 38 | Gitoxin                                     | C <sub>41</sub> H <sub>64</sub> O <sub>14</sub>                               | 780.96  | Cardiotonic                                              | Experimental        |
| 39 | Gramicidin                                  | C <sub>60</sub> H <sub>92</sub> N <sub>12</sub> O <sub>10</sub>               | 1141.48 | Antibacterial                                            | USP                 |
| 40 | Homidium bromide                            | C <sub>21</sub> H <sub>20</sub> BrN <sub>3</sub>                              | 394.32  | Antiprotozoal, intercalate with DNA                      | INN, BAN            |
| 41 | Mebendazole                                 | C <sub>16</sub> H <sub>13</sub> N <sub>3</sub> O <sub>3</sub>                 | 295.3   | Anthelmintic                                             | USP, INN, BAN, JAN  |
| 42 | Methotrexate                                | C <sub>20</sub> H <sub>22</sub> N <sub>8</sub> O <sub>5</sub>                 | 454.45  | Antineoplastic, antirheumatic                            | USP, INN, BAN, JAN  |
| 43 | Methylene blue                              | C <sub>16</sub> H <sub>20</sub> ClN <sub>3</sub> OS                           | 337.87  | Antimethemoglobinemic, cyanide antidote                  | USP, INN, BAN       |
| 44 | Mitomycin C                                 | C <sub>15</sub> H <sub>18</sub> N <sub>4</sub> O <sub>5</sub>                 | 334.33  | Antineoplastic                                           | USP, INN, BAN, JAN  |
| 45 | Mitoxantrone hydrochloride                  | C <sub>22</sub> H <sub>30</sub> Cl <sub>2</sub> N <sub>4</sub> O <sub>6</sub> | 517.41  | Antineoplastic                                           | USP, INN, BAN, JAN  |
| 46 | Monensin sodium                             | C <sub>37</sub> H <sub>63</sub> NaO <sub>10</sub>                             | 690.9   | Antibacterial                                            | USP, INN, BAN       |
| 47 | Niclosamide                                 | C <sub>13</sub> H <sub>8</sub> Cl <sub>2</sub> N <sub>2</sub> O <sub>4</sub>  | 327.13  | Anthelmintic, teniacide                                  | USAN, INN, BAN      |
| 48 | Oxibendazole                                | C <sub>12</sub> H <sub>15</sub> N <sub>3</sub> O <sub>3</sub>                 | 249.27  | Anthelmintic                                             | USAN, INN, BAN      |
| 49 | Oubain                                      | C <sub>29</sub> H <sub>44</sub> O <sub>12</sub>                               | 584.67  | Cardiotonic, antiarrhythmic, hypertensive                | JAN                 |
| 50 | Paclitaxel                                  | C <sub>47</sub> H <sub>51</sub> NO <sub>14</sub>                              | 853.93  | Antineoplastic                                           | USP, INN, BAN       |
| 51 | Pararosaniline pamoate                      | C <sub>42</sub> H <sub>33</sub> N <sub>3</sub> O <sub>6</sub>                 | 675.75  | Anthelmintic, antischistosomal                           | USAN, INN           |
| 52 | Patulin                                     | C <sub>7</sub> H <sub>6</sub> O <sub>4</sub>                                  | 154.12  | Antibacterial                                            | Experimental        |
| 53 | Peruvoside                                  | C <sub>30</sub> H <sub>44</sub> O <sub>9</sub>                                | 548.68  | Cardiotonic                                              | Experimental        |
| 54 | Phenethyl caffeate (CAPE)                   | C <sub>17</sub> H <sub>16</sub> O <sub>4</sub>                                | 284.31  | Antineoplastic, antiinflammatory                         | Experimental        |
| 55 | Picropodophyllin                            | C <sub>22</sub> H <sub>22</sub> O <sub>8</sub>                                | 414.42  | Antineoplastic, insulin growth factor receptor inhibitor | Experimental        |
| 56 | Plumbagin                                   | C <sub>11</sub> H <sub>8</sub> O <sub>3</sub>                                 | 188.18  | Antibacterial, antifungal, tuberculostatic               | Experimental        |
| 57 | Podofilox                                   | C <sub>22</sub> H <sub>22</sub> O <sub>8</sub>                                | 414.42  | Antineoplastic, inhibits microtubule assembly and DNA    | USAN, BAN           |

|    |                                       |                                                                                 |         |                                                |                    |
|----|---------------------------------------|---------------------------------------------------------------------------------|---------|------------------------------------------------|--------------------|
| 58 | Podophyllin acetate                   | C <sub>24</sub> H <sub>24</sub> O <sub>9</sub>                                  | 456.45  | Undetermined                                   | Experimental       |
| 59 | Pristimerin                           | C <sub>30</sub> H <sub>40</sub> O <sub>4</sub>                                  | 464.65  | Antineoplastic, antiinflammatory               | Experimental       |
| 60 | Puromycin hydrochloride               | C <sub>22</sub> H <sub>31</sub> Cl <sub>2</sub> N <sub>7</sub> O <sub>5</sub>   | 544.44  | Antineoplastic, antiprotozoal                  | USAN, INN, BAN     |
| 61 | Pyrrithione zinc                      | C <sub>10</sub> H <sub>10</sub> N <sub>2</sub> O <sub>2</sub> S <sub>2</sub> Z  | 319.70  | Antibacterial, antifungal, antiseborrheic      | USAN, INN, BAN     |
| 62 | Pyrvinium pamoate                     | C <sub>49</sub> H <sub>43</sub> N <sub>3</sub> O <sub>6</sub>                   | 769.91  | Anthelmintic                                   | USP, BAN, JAN      |
| 63 | Rotenone                              | C <sub>23</sub> H <sub>22</sub> O <sub>6</sub>                                  | 394.43  | Acaricide, ectoparasiticide, antineoplastic    | Agricultural use   |
| 64 | Salinomycin, sodium                   | C <sub>42</sub> H <sub>69</sub> NaO <sub>11</sub>                               | 773.00  | Antibacterial                                  | INN, BAN           |
| 65 | Simvastatin                           | C <sub>25</sub> H <sub>38</sub> O <sub>5</sub>                                  | 418.58  | Antihyperlipidemic, HMGCoA reductase inhibitor | USP, INN, BAN      |
| 66 | Sodium tetradecyl sulfate             | C <sub>14</sub> H <sub>29</sub> NaO <sub>4</sub> S                              | 316.44  | Sclerosing agent                               | INN                |
| 67 | Strophanthidin                        | C <sub>23</sub> H <sub>32</sub> O <sub>6</sub>                                  | 404.51  | Cardiotonic                                    | Experimental       |
| 68 | Strophanthidinic acid lactone acetate | C <sub>25</sub> H <sub>32</sub> O <sub>7</sub>                                  | 444.53  | Undetermined                                   | Experimental       |
| 69 | Teniposide                            | C <sub>32</sub> H <sub>32</sub> O <sub>13</sub> S                               | 656.67  | Antineoplastic                                 | USAN, INN, BAN     |
| 70 | Tetrachloroisophthalonitrile          | C <sub>8</sub> Cl <sub>4</sub> N <sub>2</sub>                                   | 265.91  | Antifungal                                     | Experimental       |
| 71 | Thimerosal                            | C <sub>9</sub> H <sub>9</sub> HgNaO <sub>2</sub> S                              | 404.81  | Anti-infective, preservative                   | USP, INN, BAN, JAN |
| 72 | Thiram                                | C <sub>6</sub> H <sub>12</sub> N <sub>2</sub> S <sub>4</sub>                    | 240.43  | Antifungal                                     | USAN, INN          |
| 73 | Topotecan hydrochloride               | C <sub>23</sub> H <sub>24</sub> ClN <sub>3</sub> O <sub>5</sub>                 | 457.92  | Antineoplastic, topoisomerase I inhibitor      | USAN, INN, BAN     |
| 74 | Trifluoperazine hydrochloride         | C <sub>21</sub> H <sub>26</sub> Cl <sub>2</sub> F <sub>3</sub> N <sub>3</sub> S | 480.43  | Antipsychotic                                  | USP, INN, BAN, JAN |
| 75 | Tyrothricin                           | C <sub>66</sub> H <sub>85</sub> N <sub>11</sub> O <sub>15</sub>                 | 1272.48 | Topical antibacterial                          | USP, INN, BAN      |
| 76 | Valinomycin                           | C <sub>54</sub> H <sub>90</sub> N <sub>6</sub> O <sub>18</sub>                  | 1111.35 | Antibacterial                                  | Experimental       |
| 77 | Vinblastine sulfate                   | C <sub>46</sub> H <sub>60</sub> N <sub>4</sub> O <sub>13</sub> S                | 909.07  | Antineoplastic, spindle poison                 | USP, INN, BAN, JAN |
| 78 | Vincristine sulfate                   | C <sub>46</sub> H <sub>58</sub> N <sub>4</sub> O <sub>14</sub> S                | 923.06  | Antineoplastic                                 | USP, INN, BAN, JAN |

Abbreviations:

BAN: British Approved Name

INN: International Nonproprietary Name

JAN: Japanese Accepted Name

USAN: United States Adopted Name

USP: United States Pharmacopeia

**Table S3. Specific inhibitors of GSC proliferation.**

| Compound | Formula                       | Mol. weight                                                                      | Activity | Active against                              |       |       |       |      |   |
|----------|-------------------------------|----------------------------------------------------------------------------------|----------|---------------------------------------------|-------|-------|-------|------|---|
|          |                               |                                                                                  |          | SN143                                       | SN175 | SN179 | SN186 | G144 |   |
| 1        | 3,4-Dimethoxyflavone          | C <sub>17</sub> H <sub>14</sub> O <sub>4</sub>                                   | 282.3    | Undetermined                                | X     | X     |       |      | X |
| 2        | 3β-Acetoxydeoxodihydrogedunin | C <sub>30</sub> H <sub>40</sub> O <sub>8</sub>                                   | 528.65   | Undetermined                                | X     |       |       |      |   |
| 3        | 3-Methoxycatechol             | C <sub>7</sub> H <sub>8</sub> O <sub>3</sub>                                     | 140.14   | Undetermined                                |       | X     |       |      | X |
| 4        | 4'-Hydroxychalcone            | C <sub>15</sub> H <sub>12</sub> O <sub>2</sub>                                   | 224.26   | Undetermined                                |       | X     |       |      |   |
| 5        | 5α-Cholestan-3β-ol-6-one      | C <sub>27</sub> H <sub>48</sub>                                                  | 372.68   | Undetermined                                |       |       | X     | X    |   |
| 6        | 7-Oxocholesterol              | C <sub>27</sub> H <sub>44</sub> O <sub>2</sub>                                   | 400.65   | Undetermined                                | X     |       |       | X    |   |
| 7        | Aceexamid acid                | C <sub>8</sub> H <sub>15</sub> NO <sub>3</sub>                                   | 173.21   | Wound healing agent, undetermined           |       |       | X     |      |   |
| 8        | Adenosine                     | C <sub>10</sub> H <sub>13</sub> N <sub>5</sub> O <sub>4</sub>                    | 267.25   | Antiarrhythmic                              |       |       | X     | X    |   |
| 9        | Adenosine phosphate           | C <sub>10</sub> H <sub>14</sub> N <sub>5</sub> O <sub>7</sub> P                  | 347.23   | Vasodilator, neuromodulator                 |       |       | X     | X    |   |
| 10       | Alexidine hydrochloride       | C <sub>26</sub> H <sub>58</sub> C <sub>12</sub> N <sub>10</sub>                  | 581.73   | Antibacterial                               |       |       |       | X    |   |
| 11       | Bleomycin                     | C <sub>55</sub> H <sub>84</sub> N <sub>17</sub> O <sub>21</sub> S <sub>3</sub>   | 1415.55  | Antineoplastic                              |       |       |       | X    |   |
| 12       | Brompheniramine maleate       | C <sub>20</sub> H <sub>23</sub> BrN <sub>2</sub> O <sub>4</sub>                  | 435.32   | H1 antihistamine                            | X     | X     |       |      |   |
| 13       | Canthaxanthin                 | C <sub>40</sub> H <sub>52</sub> O <sub>2</sub>                                   | 564.86   | Undetermined                                | X     |       |       |      | X |
| 14       | Carboplatin                   | C <sub>6</sub> H <sub>12</sub> N <sub>2</sub> O <sub>4</sub> Pt                  | 371.26   | Antineoplastic                              | X     |       |       |      |   |
| 15       | Carmofur                      | C <sub>11</sub> H <sub>16</sub> FN <sub>3</sub> O <sub>3</sub>                   | 257.27   | Antineoplastic                              | X     | X     |       |      |   |
| 16       | Cedrelone                     | C <sub>26</sub> H <sub>30</sub> O <sub>5</sub>                                   | 422.53   | Undetermined                                | X     | X     | X     |      |   |
| 17       | Cetrimonium bromide           | C <sub>19</sub> H <sub>42</sub> BrN                                              | 364.45   | Component of antiseptic, undetermined       |       | X     |       |      |   |
| 18       | Clofazimine                   | C <sub>27</sub> H <sub>22</sub> C <sub>12</sub> N <sub>4</sub>                   | 473.41   | Antibacterial                               |       |       | X     |      |   |
| 19       | Clonidine hydrochloride       | C <sub>9</sub> H <sub>10</sub> C <sub>13</sub> N <sub>3</sub>                    | 266.56   | Antihypertensive                            | X     | X     | X     |      |   |
| 20       | Cryptotanshinone              | C <sub>19</sub> H <sub>20</sub> O <sub>3</sub>                                   | 296.37   | Inhibits angiogenesis, undetermined         |       | X     |       | X    |   |
| 21       | Deoxyadenosine                | C <sub>10</sub> H <sub>13</sub> N <sub>5</sub> O <sub>3</sub>                    | 251.25   | Undetermined                                |       |       | X     | X    |   |
| 22       | Diallyl trisulfide            | C <sub>6</sub> H <sub>10</sub> S <sub>3</sub>                                    | 178.28   | Undetermined                                |       |       | X     |      |   |
| 23       | Ethacrynic acid               | C <sub>13</sub> H <sub>12</sub> C <sub>12</sub> O <sub>4</sub>                   | 303.14   | Diuretic                                    |       |       | X     |      |   |
| 24       | Flourouracil                  | C <sub>4</sub> H <sub>3</sub> FN <sub>2</sub> O <sub>2</sub>                     | 130.08   | Antineoplastic                              |       | X     |       |      |   |
| 25       | Fluphenazine hydrochloride    | C <sub>22</sub> H <sub>28</sub> C <sub>12</sub> F <sub>3</sub> N <sub>3</sub> OS | 510.45   | H1 antihistamine                            |       |       | X     |      | X |
| 26       | Gentian violet                | C <sub>25</sub> H <sub>30</sub> CIN <sub>3</sub>                                 | 407.99   | Antibacterial                               | X     |       |       |      |   |
| 27       | Gossypol                      | C <sub>30</sub> H <sub>30</sub> O <sub>8</sub>                                   | 518.57   | Antineoplastic                              |       | X     |       |      |   |
| 28       | Harmaline                     | C <sub>13</sub> H <sub>14</sub> N <sub>2</sub> O                                 | 214.25   | Psychotropic, CNS stimulant, antiparkinsons |       | X     | X     |      |   |
| 29       | Harmine                       | C <sub>13</sub> H <sub>12</sub> N <sub>2</sub> O                                 | 212.25   | Psychotropic, CNS stimulant, antiparkinsons |       | X     |       |      |   |

|                     |                             |                                                                                 |        |                                               |    |    |    |    |    |
|---------------------|-----------------------------|---------------------------------------------------------------------------------|--------|-----------------------------------------------|----|----|----|----|----|
| 30                  | Helenine                    | C <sub>15</sub> H <sub>20</sub> O <sub>2</sub>                                  | 232.33 | Antihelminthic                                |    | X  | X  |    | X  |
| 31                  | Hexetidine                  | C <sub>21</sub> H <sub>45</sub> N <sub>3</sub>                                  | 339.61 | Antifungal                                    | X  |    | X  | X  |    |
| 32                  | Irigenin                    | C <sub>18</sub> H <sub>16</sub> O <sub>8</sub>                                  | 360.32 | Undetermined                                  | X  | X  |    |    |    |
| 33                  | Lappaconitine               | C <sub>32</sub> H <sub>44</sub> N <sub>2</sub> O <sub>8</sub>                   | 584.72 | Antiarrhythmic                                |    | X  | X  |    | X  |
| 34                  | Melphalan                   | C <sub>13</sub> H <sub>18</sub> Cl <sub>2</sub> N <sub>2</sub> O <sub>2</sub>   | 305.21 | Antineoplastic                                |    | X  | X  |    |    |
| 35                  | Methylbenzethonium chloride | C <sub>28</sub> H <sub>44</sub> ClNO <sub>2</sub>                               | 462.13 | Anti-infective                                |    |    | X  | X  |    |
| 36                  | Mevastatin                  | C <sub>23</sub> H <sub>34</sub> O <sub>5</sub>                                  | 390.52 | Antihyperlipidemic                            |    |    | X  | X  |    |
| 37                  | Minoxidil                   | C <sub>9</sub> H <sub>15</sub> N <sub>5</sub> O                                 | 209.25 | Antihypertensive                              |    | X  |    |    |    |
| 38                  | Mycophenolate mofetil       | C <sub>23</sub> H <sub>31</sub> NO <sub>7</sub>                                 | 433.49 | Immunosuppressant                             |    | X  | X  |    |    |
| 39                  | Nadide                      | C <sub>21</sub> H <sub>27</sub> N <sub>7</sub> O <sub>14</sub> P <sub>2</sub>   | 663.44 | Alcohol antagonist                            |    |    | X  |    |    |
| 40                  | Nithiamide                  | C <sub>5</sub> H <sub>5</sub> N <sub>3</sub> O <sub>3</sub> S                   | 187.18 | Antibacterial                                 |    | X  |    |    |    |
| 41                  | Norcantharidin              | C <sub>8</sub> H <sub>8</sub> O <sub>4</sub>                                    | 168.15 | Antineoplastic, protein phosphatase inhibitor |    |    | X  |    |    |
| 42                  | Obtusaquinone               | C <sub>16</sub> H <sub>14</sub> O <sub>3</sub>                                  | 254.29 | Undetermined                                  |    | X  |    |    | X  |
| 43                  | Osajin                      | C <sub>25</sub> H <sub>24</sub> O <sub>5</sub>                                  | 404.46 | Apoptosis inducer, undetermined               | X  |    |    |    |    |
| 44                  | Oxelaidin citrate           | C <sub>26</sub> H <sub>41</sub> NO <sub>10</sub>                                | 527.62 | Antitussive, undetermined                     |    |    | X  |    |    |
| 45                  | Pangamic acid sodium        | C <sub>10</sub> H <sub>18</sub> NNaO <sub>8</sub>                               | 303.25 | Undetermined                                  |    | X  |    |    | X  |
| 46                  | Pindolol                    | C <sub>14</sub> H <sub>20</sub> N <sub>2</sub> O <sub>2</sub>                   | 248.33 | Antihypertensive                              |    | X  | X  | X  |    |
| 47                  | Piplartine                  | C <sub>17</sub> H <sub>19</sub> NO <sub>5</sub>                                 | 317.34 | Antibronchitis, undetermined                  |    | X  | X  | X  |    |
| 48                  | Pramoxine hydrochloride     | C <sub>17</sub> H <sub>28</sub> ClNO <sub>3</sub>                               | 329.87 | Anesthetic, undetermined                      |    |    | X  |    |    |
| 49                  | Pyrrromycin                 | C <sub>30</sub> H <sub>35</sub> NO <sub>11</sub>                                | 585.61 | Antibacterial                                 |    | X  |    |    |    |
| 50                  | Rosuvastatin calcium        | C <sub>22</sub> H <sub>27</sub> CaFN <sub>3</sub> O <sub>6</sub> S              | 520.62 | Antihyperlipidemic                            |    |    | X  |    |    |
| 51                  | Securinine                  | C <sub>13</sub> H <sub>15</sub> NO <sub>2</sub>                                 | 217.27 | Psychotropic, CNS stimulant                   |    | X  |    |    |    |
| 52                  | Sirolimus                   | C <sub>51</sub> H <sub>79</sub> NO <sub>13</sub>                                | 914.17 | Immunosuppressant, antineoplastic             | X  | X  |    |    |    |
| 53                  | Sulconazole nitrate         | C <sub>18</sub> H <sub>16</sub> C <sub>13</sub> N <sub>3</sub> O <sub>3</sub> S | 460.77 | Antifungal                                    |    |    | X  |    | X  |
| 54                  | Suloctidil                  | C <sub>20</sub> H <sub>35</sub> NO <sub>8</sub>                                 | 337.57 | Peripheral vasodilator                        |    |    | X  | X  | X  |
| 55                  | Trimebutine maleate         | C <sub>26</sub> H <sub>33</sub> NO <sub>9</sub>                                 | 503.55 | Antispasmodic, undetermined                   |    |    | X  |    |    |
| Total active agents |                             |                                                                                 |        |                                               | 14 | 27 | 29 | 14 | 10 |

**Table S4. Half maximal inhibitory concentrations (IC<sub>50</sub>) for common inhibitors of GSC proliferation.**

| Compound |                                                 | NSC    | SN143   | SN175  | SN179  | SN186  | G144   | Average | SD     |
|----------|-------------------------------------------------|--------|---------|--------|--------|--------|--------|---------|--------|
| 1        | 10-Hydroxycamptothecin                          | 0.177  | 0.004   | 0.187  | 0.169  | 0.01   | 0.005  | 0.075   | 0.095  |
| 2        | 2,3-Dichloro-5,8-dihydroxynaphthoquinone        | 0.812  | 0.131   | 0.167  | 0.198  | 0.184  | 0.173  | 0.171   | 0.025  |
| 3        | 3 $\beta$ -Hydroxy-23,24-bisnorchol-5-enic acid | 0.324  | 0.330   | 0.542  | 0.375  | 0.122  | 0.310  | 0.336   | 0.150  |
| 4        | 4'-Demethylepipodophyllotoxin                   | 0.151  | 0.039   | 0.077  | 0.029  | 0.023  | 0.022  | 0.038   | 0.023  |
| 5        | Acetyl gambogic acid                            | 0.920  | 0.203   | 0.203  | 0.603  | 0.425  | 0.476  | 0.382   | 0.176  |
| 6        | Albendazole                                     | 0.388  | 0.367   | 0.427  | 0.363  | 0.370  | 0.903  | 0.486   | 0.235  |
| 7        | Amsacrine                                       | 0.072  | 0.174   | 0.132  | 0.678  | 0.077  | 0.195  | 0.251   | 0.243  |
| 8        | Ancitabine hydrochloride                        | 0.191  | 0.018   | 0.218  | 0.093  | 0.208  | 0.549  | 0.217   | 0.203  |
| 9        | Anisomycin                                      | 0.129  | 0.034   | 0.062  | 0.100  | 0.034  | 0.056  | 0.057   | 0.027  |
| 10       | Anthothecol                                     | 0.870  | 0.234   | 0.273  | 0.579  | 0.396  | 0.250  | 0.346   | 0.145  |
| 11       | Antimycin A                                     | 0.084  | 0.389   | 0.004  | 3.90   | 0.012  | 3.80   | 1.621   | 2.041  |
| 12       | Atorvastatin calcium*                           | 54.7%  | 26.3%   | 46.2%  | 12.1%  | 21.93% | 31.2%  | 27.55%  | 12.58  |
| 13       | Benzalkonium chloride                           | 5.073  | 5.142   | 3.771  | 3.669  | 2.758  | 1.10   | 3.288   | 1.49   |
| 14       | $\beta$ -Peltatin                               | 0.127  | 0.057   | 0.082  | 0.048  | 0.041  | 0.035  | 0.053   | 0.018  |
| 15       | Camptothecin                                    | 0.148  | 0.302   | 0.630  | 0.267  | 0.010  | 0.420  | 0.326   | 0.226  |
| 16       | Colchicine                                      | 0.334  | 0.017   | 0.016  | 0.014  | 0.0014 | 0.003  | 0.010   | 0.0075 |
| 17       | Convallatoxin*                                  | 117.6% | 9.5E-05 | 0.053  | 0.023  | 0.023  | 0.0001 | 0.020   | 0.0218 |
| 18       | Cytarabine                                      | 0.515  | 0.042   | 0.327  | 0.250  | 0.852  | 3.50   | 0.994   | 1.432  |
| 19       | Dactinomycin                                    | 0.115  | 0.0033  | 0.0038 | 0.0009 | 0.025  | 0.003  | 0.007   | 0.01   |
| 20       | Daunorubicin                                    | 0.267  | 0.077   | 0.239  | 0.202  | 0.051  | 0.159  | 0.146   | 0.08   |
| 21       | Deguelin*                                       | 0.021  | 0.10    | 0.201  | 83.2%  | 0.085  | 1.05   | 0.359   | 0.464  |
| 22       | Deoxysappanone B 7,4'-dimethyl ether            | 1.507  | 0.188   | 0.291  | 0.189  | 0.178  | 0.224  | 0.214   | 0.046  |
| 23       | Deoxysappanone B 7,3-dimethyl ether acetate*    | 1.32   | 28.6%   | 28.6%  | 39.5%  | 36.24% | 38.3%  | 34.25%  | 5.29   |
| 24       | Digitonin                                       | 1.706  | 0.798   | 0.471  | 0.579  | 0.421  | 0.894  | 0.633   | 0.206  |
| 25       | Digitoxin*                                      | 95.1%  | 0.106   | 0.307  | 0.166  | 0.149  | 0.094  | 0.164   | 0.085  |
| 26       | Digoxigenin*                                    | 120.8% | 0.466   | 1.818  | 0.415  | 0.24   | 0.263  | 0.640   | 0.665  |
| 27       | Digoxin*                                        | 103.5% | 0.059   | 0.261  | 0.107  | 0.074  | 0.028  | 0.106   | 0.0913 |
| 28       | Disulfiram                                      | 0.283  | 0.028   | 0.037  | 0.04   | 0.028  | 0.039  | 0.034   | 0.0059 |

|    |                            |        |         |        |       |        |         |        |        |
|----|----------------------------|--------|---------|--------|-------|--------|---------|--------|--------|
| 29 | Doxorubicin                | 0.144  | 0.045   | 0.129  | 0.169 | 0.037  | 0.067   | 0.089  | 0.0573 |
| 30 | Emetine                    | 0.112  | 0.031   | 0.040  | 0.038 | 0.064  | 0.041   | 0.043  | 0.0125 |
| 31 | Epirubicin hydrochloride   | 1.20   | 0.169   | 0.387  | 0.227 | 0.048  | 0.737   | 0.313  | 0.2663 |
| 32 | Etoposide                  | 6.89   | 1.30    | 0.447  | 5.62  | 0.28   | 1.10    | 1.749  | 2.206  |
| 33 | Fenbendazole               | 1.918  | 0.836   | 1.124  | 0.661 | 0.562  | 0.892   | 0.815  | 0.2177 |
| 34 | Fludarabine phosphate*     | 121.5% | 98.4%   | 0.135  | 0.143 | 0.112  | 0.109   | 0.125  | 0.0168 |
| 35 | Fluvastatin                | 2.32   | 14.69   | 18.82  | 0.552 | 0.386  | 2.0     | 7.290  | 8.786  |
| 36 | Gambogic acid              | 0.31   | 0.076   | 0.109  | 0.268 | 0.0997 | 0.115   | 0.134  | 0.0766 |
| 37 | Gitoxigenin diacetate      | 5.027  | 0.096   | 0.289  | 0.171 | 0.096  | 0.049   | 0.140  | 0.094  |
| 38 | Gitoxin*                   | 122.3% | 0.276   | 1.693  | 0.384 | 0.238  | 0.097   | 0.538  | 0.654  |
| 39 | Gramicidin                 | 0.918  | 0.001   | 0.0001 | 0.031 | 0.018  | 0.00002 | 0.010  | 0.014  |
| 40 | Homidium bromide*          | 9.1%   | 5.3%    | 4.8%   | 1.7%  | 30.45% | 15.8%   | 11.61% | 11.8   |
| 41 | Mebendazole                | 0.458  | 0.339   | 0.546  | 0.375 | 0.282  | 0.335   | 0.375  | 0.101  |
| 42 | Methotrexate*              | 0.162  | 86.7%   | 71.02% | 0.128 | 0.061  | 0.293   | 0.161  | 0.1194 |
| 43 | Methylene blue*            | 11.3%  | 3.7%    | 1.9%   | 7.5%  | 5.83%  | 3.9%    | 4.57%  | 2.15   |
| 44 | Mitomycin C                | 9.199  | 0.0695  | 0.425  | 0.818 | 0.110  | 0.268   | 0.338  | 0.303  |
| 45 | Mitoxantrone hydrochloride | 0.208  | 0.605   | 0.136  | 0.125 | 0.321  | 0.052   | 0.248  | 0.223  |
| 46 | Monensin sodium            | 0.896  | 0.256   | 0.33   | 0.085 | 0.073  | 0.234   | 0.196  | 0.1123 |
| 47 | Niclosamide                | 2.466  | 1.43    | 1.372  | 1.194 | 1.568  | 1.20    | 1.353  | 0.16   |
| 48 | Oxibendazole               | 1.371  | 0.416   | 0.822  | 0.687 | 0.489  | 0.53    | 0.589  | 0.164  |
| 49 | Ouabain                    | 4.20   | 0.005   | 0.134  | 0.031 | 0.006  | 0.00013 | 0.035  | 0.0565 |
| 50 | Paclitaxel*                | 0.126  | 0.013   | 42.3%  | 56.9% | 0.0028 | 0.009   | 0.008  | 0.005  |
| 51 | Pararosaniline pamoate*    | 9.7%   | 1.1%    | 1.6%   | 1.2%  | 1.3%   | 1.1%    | 1.26%  | 0.21   |
| 52 | Patulin                    | 0.383  | 0.145   | 0.282  | 0.164 | 0.174  | 0.290   | 0.211  | 0.069  |
| 53 | Peruvoside*                | 119.6% | 1.5E-05 | 0.1196 | 0.015 | 0.012  | 0.006   | 0.031  | 0.05   |
| 54 | Phenethyl caffeate (CAPE)  | 13.25  | 1.125   | 0.768  | 0.341 | 0.802  | 0.941   | 0.796  | 0.29   |
| 55 | Picropodophyllin           | 0.991  | 0.291   | 0.44   | 0.371 | 0.39   | 0.148   | 0.328  | 0.114  |
| 56 | Plumbagin                  | 0.865  | 0.693   | 1.068  | 0.845 | 0.443  | 0.228   | 0.655  | 0.33   |
| 57 | Podofilox                  | 0.028  | 0.017   | 0.038  | 0.06  | 0.007  | 0.0008  | 0.0243 | 0.0243 |
| 58 | Podophyllin acetate*       | 17.4%  | 0.008   | 0.029  | 0.004 | 0.0354 | 0.121   | 0.0395 | 0.0475 |
| 59 | Pristimerin                | 1.577  | 0.489   | 0.456  | 1.019 | 0.516  | 0.436   | 0.583  | 0.246  |
| 60 | Puromycin hydrochloride*   | 104.6% | 0.206   | 0.365  | 0.410 | 0.129  | 0.194   | 0.2609 | 0.1204 |



|    |                                        |        |        |         |       |        |       |        |        |
|----|----------------------------------------|--------|--------|---------|-------|--------|-------|--------|--------|
| 61 | Pyrrithione zinc*                      | 1.79%  | 0.2%   | 0.2%    | 0.3%  | 0.65%  | 0.3%  | 0.33%  | 0.19   |
| 62 | Pyrvinium pamoate                      | 0.871  | 0.08   | 0.149   | 0.187 | 0.124  | 0.26  | 0.1598 | 0.068  |
| 63 | Rotenone*                              | 54.2%  | 20.7%  | 24.8%   | 47.7% | 49.28% | 41.9% | 36.88% | 13.26  |
| 64 | Salinomycin, sodium                    | 0.143  | 0.293  | 0.508   | 0.226 | 0.240  | 0.590 | 0.371  | 0.167  |
| 65 | Simvastatin                            | 2.16   | 1.97   | 2.36    | 0.133 | 0.362  | 1.70  | 1.305  | 0.997  |
| 66 | Sodium tetradecyl sulfate*             | 31.9%  | 38.6%  | 31.9%   | 29.7% | 27.48% | 33.0% | 32.14% | 4.19   |
| 67 | Strophanthidin*                        | 124.7% | 0.145  | 0.844   | 0.264 | 0.294  | 0.082 | 0.326  | 0.3023 |
| 68 | Strophanthidinic acid lactone acetate* | 110.8% | 0.266  | 0.970   | 0.623 | 0.286  | 0.124 | 0.4538 | 0.3418 |
| 69 | Teniposide                             | 0.12   | 0.036  | 1.054   | 0.195 | 0.116  | 0.054 | 0.291  | 0.431  |
| 70 | Tetrachloroisophthalonitrile           | 0.061  | 0.012  | 0.035   | 0.042 | 0.036  | 0.026 | 0.0302 | 0.0117 |
| 71 | Thimerosal*                            | 0.4%   | 0.1%   | 0.1%    | 0.1%  | 0.009% | 0.2%  | 0.1%   | 0.07   |
| 72 | Thiram                                 | 0.317  | 0.044  | 0.042   | 0.046 | 0.029  | 0.048 | 0.0419 | 0.0075 |
| 73 | Topotecan hydrochloride                | 0.125  | 0.038  | 0.05    | 1.737 | 0.043  | 0.013 | 0.376  | 0.7608 |
| 74 | Trifluoperazine hydrochloride*         | 106.4% | 102.4% | 103.3%  | 0.578 | 0.303  | 1.70  | 0.860  | 0.74   |
| 75 | Tyrothricin*                           | 0.73%  | 0.2%   | 0%      | 0.5%  | 0.4%   | 0.3%  | 0.28%  | 0.19   |
| 76 | Valinomycin                            | 0.0195 | 0.001  | 0.035   | 0.016 | 0.008  | 0.007 | 0.0135 | 0.0132 |
| 77 | Vinblastine sulfate                    | 0.103  | 0.002  | 0.0018  | 0.011 | 0.001  | 0.003 | 0.004  | 0.0041 |
| 78 | Vincristine sulfate                    | 0.085  | 0.04   | 1.2E-07 | 0.028 | 0.003  | 4E-08 | 0.0142 | 0.0186 |

IC<sub>50</sub> values (μM) for GSCs are presented with the average and standard deviation (SD).

\*Data are presented as % survival at 10 μM where no clear sigmoidal relationship was observed in the tested concentration range (0.01 – 10 μM).

**Table S5. Polar surface area (PSA) for inhibitors of GSC proliferation.**

|    | Compound                                        | IC <sub>50</sub><br>( $\mu$ M) | Activity                                       | Status              | Violations | PSA<br>( $\text{\AA}^2$ ) |
|----|-------------------------------------------------|--------------------------------|------------------------------------------------|---------------------|------------|---------------------------|
| 1  | 10-Hydroxycamptothecin                          | 0.075                          | Antineoplastic                                 | Experimental        | 0          | 77.96                     |
| 2  | 2,3-Dichloro-5,8-dihydroxynaphthoquinone        | 0.171                          | Apoptosis inducer                              | Experimental        | 0          | 74.6                      |
| 3  | 3 $\beta$ -Hydroxy-23,24-bisnorchol-5-enic acid | 0.336                          | Undetermined                                   | Experimental        | 0          | 35.53                     |
| 4  | 4'-Demethylepipodophyllotoxin                   | 0.038                          | Antineoplastic                                 | Experimental        | 0          | 81.68                     |
| 5  | Acetyl gambogic acid                            | 0.382                          | Derivative of gambogic acid, undetermined      | Experimental        | 2          | 159.36                    |
| 6  | Albendazole                                     | 0.486                          | Anthelmintic                                   | USP                 | 0          | 72.66                     |
| 7  | Amsacrine                                       | 0.251                          | Antineoplastic, immune suppressive             | USAN, INN, BAN      | 0          | 71.12                     |
| 8  | Ancitabine hydrochloride                        | 0.217                          | Antineoplastic                                 | INN, JAN            | 0          | 98.37                     |
| 9  | Anisomycin                                      | 0.057                          | Antibacterial, inhibits protein synthesis      | Experimental        | 0          | 48.0                      |
| 10 | Anthothecol                                     | 0.346                          | Undetermined                                   | Experimental        | 1          | 106.34                    |
| 11 | Antimycin A                                     | 1.621                          | Antifungal, antiviral                          | Experimental        | 2          | 128.75                    |
| 12 | Atorvastatin calcium                            | 27.55%                         | Antihyperlipidemic, HMGCoA reductase inhibitor | USAN, INN, BAN      | 2          | 80.59                     |
| 13 | Benzalkonium chloride                           | 3.288                          | Topical anti-infective                         | USAN, INN, BAN, JAN | 0          | 0                         |
| 14 | $\beta$ -Peltatin                               | 0.053                          | Natural product with antitumor activity        | Experimental        | 0          | 81.63                     |
| 15 | Camptothecin                                    | 0.326                          | Antineoplastic                                 | Experimental        | 0          | 79.93                     |
| 16 | Colchicine                                      | 0.010                          | Anti-infective, antimetabolic, antigout agent  | USP, JAN            | 0          | 74.3                      |
| 17 | Convallatoxin                                   | 0.020                          | Cardiotonic                                    | Experimental        | 3          | 107.98                    |
| 18 | Cytarabine                                      | 0.994                          | Antineoplastic, antiviral                      | USP, INN, BAN, JAN  | 1          | 72.83                     |
| 19 | Dactinomycin                                    | 0.007                          | Antineoplastic, intercalating agent            | USP, INN, BAN, JAN  | 3          | 355.54                    |
| 20 | Daunorubicin                                    | 0.146                          | Antineoplastic                                 | USAN, INN, BAN, JAN | 3          | 185.84                    |
| 21 | Deguelin                                        | 0.359                          | Antineoplastic, antiviral, insecticide         | Experimental        | 0          | 63.22                     |
| 22 | Deoxysappanone B 7,4'-dimethyl ether            | 0.214                          | Undetermined                                   | Experimental        | 0          | 53.99                     |
| 23 | Deoxysappanone B 7,3-dimethyl ether acetate     | 34.25%                         | Undetermined                                   | Experimental        | 0          | 71.06                     |
| 24 | Digitonin                                       | 0.633                          | Cardiotonic                                    | Experimental        | 3          | 267.67                    |
| 25 | Digitoxin                                       | 0.164                          | Cardiotonic, inotropic                         | USP, INN, BAN, JAN  | 3          | 182.83                    |
| 26 | Digoxigenin                                     | 0.640                          | Aglycon of digitoxin                           | Experimental        | 0          | 53.99                     |
| 27 | Digoxin                                         | 0.106                          | Cardiac stimulant                              | USP, INN, BAN, JAN  | 3          | 137.06                    |
| 28 | Disulfiram*                                     | 0.034                          | Alcohol antagonist                             | USP, INN, BAN, JAN  | 0          | 121.26                    |
| 29 | Doxorubicin                                     | 0.089                          | Antineoplastic                                 | USAN, INN, BAN      | 3          | 206.07                    |
| 30 | Emetine                                         | 0.043                          | Inhibits RNA, DNA and protein synthesis        | USP, BAN            | 0          | 43.4                      |
| 31 | Epirubicin hydrochloride                        | 0.313                          | Antineoplastic                                 | USAN, INN, BAN, JAN | 3          | 128.29                    |

|    |                            |        |                                                          |                    |   |        |
|----|----------------------------|--------|----------------------------------------------------------|--------------------|---|--------|
| 32 | Etoposide                  | 1.749  | Antineoplastic                                           | USP, INN, BAN, JAN | 2 | 160.83 |
| 33 | Fenbendazole               | 0.815  | Anthelmintic                                             | USAN, INN, BAN     | 0 | 72.66  |
| 34 | Fludarabine phosphate      | 0.125  | Antineoplastic                                           | USP, INN, BAN      | 2 | 195.88 |
| 35 | Fluvastatin                | 7.290  | Antihyperlipidemic, HMGCoA reductase inhibitor           | USAN, INN, BAN     | 0 | 49.69  |
| 36 | Gambogic acid              | 0.134  | Antiinflammatory, apoptosis inducer                      | Experimental       | 2 | 119.36 |
| 37 | Gitoxigenin diacetate      | 0.140  | Aglycon of gitoxin                                       | Experimental       | 0 | 53.99  |
| 38 | Gitoxin                    | 0.538  | Cardiotonic                                              | Experimental       | 3 | 137.06 |
| 39 | Gramicidin                 | 0.010  | Antibacterial                                            | USP                | 3 | 209.58 |
| 40 | Homidium bromide           | 11.61% | Antiprotozoal, intercalate with DNA                      | INN, BAN           | 0 | 55.92  |
| 41 | Mebendazole                | 0.375  | Anthelmintic                                             | USP, INN, BAN, JAN | 0 | 64.43  |
| 42 | Methotrexate               | 0.161  | Antineoplastic, antirheumatic                            | USP, INN, BAN, JAN | 2 | 134.19 |
| 43 | Methylene blue             | 4.57%  | Antimethemoglobinemic, cyanide antidote                  | USP, INN, BAN      | 0 | 43.91  |
| 44 | Mitomycin C                | 0.338  | Antineoplastic                                           | USP, INN, BAN, JAN | 1 | 146.89 |
| 45 | Mitoxantrone hydrochloride | 0.248  | Antineoplastic                                           | USP, INN, BAN, JAN | 2 | 84.02  |
| 46 | Monensin sodium            | 0.196  | Antibacterial                                            | USP, INN, BAN      | 2 | 120.37 |
| 47 | Niclosamide                | 1.353  | Anthelmintic, teniacide                                  | USAN, INN, BAN     | 1 | 75.36  |
| 48 | Oxibendazole               | 0.589  | Anthelmintic                                             | USAN, INN, BAN     | 0 | 56.59  |
| 49 | Ouabain                    | 0.035  | Cardiotonic, antiarrhythmic, hypertensive                | JAN                | 3 | 118.6  |
| 50 | Paclitaxel                 | 0.008  | Antineoplastic                                           | USP, INN, BAN      | 2 | 221.29 |
| 51 | Pararosaniline pamoate     | 1.26%  | Anthelmintic, antischistosomal                           | USAN, INN          | 2 | 71.06  |
| 52 | Patulin                    | 0.211  | Antibacterial                                            | Experimental       | 0 | 44.76  |
| 53 | Peruvoside                 | 0.031  | Cardiotonic                                              | Experimental       | 1 | 131.75 |
| 54 | Phenethyl caffeate (CAPE)  | 0.796  | Antineoplastic, antiinflammatory                         | Experimental       | 0 | 44.76  |
| 55 | Picropodophyllin           | 0.328  | Antineoplastic, insulin growth factor receptor inhibitor | Experimental       | 0 | 81.68  |
| 56 | Plumbagin                  | 0.655  | Antibacterial, antifungal, tuberculostatic               | Experimental       | 0 | 43.37  |
| 57 | Podofilox                  | 0.0243 | Antineoplastic, inhibits microtubule assembly & DNA      | USAN, BAN          | 0 | 92.68  |
| 58 | Podophyllin acetate        | 0.0395 | Undetermined                                             | Experimental       | 1 | 151.69 |
| 59 | Pristimerin                | 0.583  | Antineoplastic, antiinflammatory                         | Experimental       | 1 | 52.6   |
| 60 | Puromycin hydrochloride    | 0.2609 | Antineoplastic, antiprotozoal                            | USAN, INN, BAN     | 2 | 107.31 |
| 61 | Pyrithione zinc            | 0.33%  | Antibacterial, antifungal, antiseborrheic                | USAN, INN, BAN     | 0 | 55.56  |
| 62 | Pyrvinium pamoate          | 0.1598 | Anthelmintic                                             | USP, BAN, JAN      | 1 | 127.0  |
| 63 | Rotenone                   | 36.88% | Acaricide, ectoparasiticide, antineoplastic              | Agricultural use   | 0 | 63.22  |
| 64 | Salinomycin, sodium        | 0.371  | Antibacterial                                            | INN, BAN           | 3 | 117.21 |
| 65 | Simvastatin                | 1.305  | Antihyperlipidemic, HMGCoA reductase inhibitor           | USP, INN, BAN      | 0 | 61.83  |
| 66 | Sodium tetradecyl sulfate  | 32.14% | Sclerosing agent                                         | INN                | 1 | 71.98  |

|    |                                       |        |                                           |                    |   |        |
|----|---------------------------------------|--------|-------------------------------------------|--------------------|---|--------|
| 67 | Strophanthidin                        | 0.326  | Cardiotonic                               | Experimental       | 0 | 71.06  |
| 68 | Strophanthidinic acid lactone acetate | 0.4538 | Undetermined                              | Experimental       | 0 | 88.13  |
| 69 | Teniposide                            | 0.291  | Antineoplastic                            | USAN, INN, BAN     | 2 | 156.07 |
| 70 | Tetrachloroisophthalonitrile          | 0.0302 | Antifungal                                | Experimental       | 0 | 47.58  |
| 71 | Thimerosal                            | 0.1%   | Anti-infective, preservative              | USP, INN, BAN, JAN | 0 | 65.43  |
| 72 | Thiram                                | 0.0419 | Antifungal                                | USAN, INN          | 0 | 121.26 |
| 73 | Topotecan hydrochloride               | 0.376  | Antineoplastic, topoisomerase I inhibitor | USAN, INN, BAN     | 0 | 81.2   |
| 74 | Trifluoperazine hydrochloride         | 0.86   | Antipsychotic                             | USP, INN, BAN, JAN | 1 | 35.02  |
| 75 | Tyrothricin                           | 0.28%  | Topical antibacterial                     | USP, INN, BAN      | 3 | 268.17 |
| 76 | Valinomycin                           | 0.0135 | Antibacterial                             | Experimental       | 4 | 332.4  |
| 77 | Vinblastine sulfate                   | 0.004  | Antineoplastic, spindle poison            | USP, INN, BAN, JAN | 2 | 121.24 |
| 78 | Vincristine sulfate                   | 0.0142 | Antineoplastic                            | USP, INN, BAN, JAN | 3 | 254.15 |

Average  $IC_{50}$  (or % survival at 10  $\mu$ M), violations of the Rule of 5 and PSA are shown. Parameters are taken from the online chemical database ChemSpider. In general, orally administered CNS-active drugs have a PSA below 120  $\text{\AA}^2$  and those that readily penetrate the BBB have a PSA below 70  $\text{\AA}^2$  [Kelder J, et al. Pharm Res. 1999; 16: 1514-1519].

\*DSF is rapidly converted in the bloodstream to its active metabolite diethyldithiocarbamate (DTTC) or methyl diethylcarbamodithioate (Me-DTTC) [Johansson B. Acta Psychiatr Scand Suppl. 1992; 369: 15-26]. PSA values are 35.33 and 60.63  $\text{\AA}^2$  for DTTC and Me-DTTC, respectively.

**Table S6. Half maximal inhibitory concentrations (IC<sub>50</sub>) for DSF–Cu against multiple patient-derived GSCs.**

| <b>GSC</b>     |       | <b>IC<sub>50</sub> (nM)</b> |
|----------------|-------|-----------------------------|
| 1              | SN143 | 27.5                        |
| 2              | SN175 | 36.5                        |
| 3              | SN179 | 39.7                        |
| 4              | SN186 | 27.6                        |
| 5              | SN187 | 25.6                        |
| 6              | SN195 | 56.3                        |
| 7              | SN206 | 14.5                        |
| 8              | SN211 | 31.8                        |
| 9              | SN235 | 12.1                        |
| 10             | G144  | 39.0                        |
| <b>Average</b> |       | 31.1                        |
